# Supplementary material for: Self-assembly of chiral hexacatenar-bisamides into a columnar structure
Source: Royal Society of Chemistry journal article supplement (doi:10.1039/c1ra00684c), 2011-12-23
Supplement: c1ra00684c.pdf [file c1ra00684c.pdf]

## Supporting Information

### Self-Assembly of Chiral Hexacatenar-Bisamides into a Columnar Structure

G. Shanker<sup>†a</sup>, D. S. Shankar Rao<sup>a</sup>, S. Krishna Prasad<sup>a</sup> and C. V. Yelamaggad<sup>\*a</sup>

<sup>a</sup>Centre for Soft Matter Research, P.B. No. 1329, Jalahalli, Bangalore 560013, India,

E-mail: [Yelamaggad@csmr.res.in](mailto:Yelamaggad@csmr.res.in)

Present address: <sup>†</sup>Institute of Chemistry, Organic Chemistry, Martin-Luther-University Halle-Wittenberg, Kurt Mothes Str. 2, D-06120 Halle/Saale, Germany

#### Contents

1. General
2. Syntheses and Analytical data.
3. Additional datas

#### 1. General

All the starting materials were obtained from Aldrich or Lancaster Companies and used as received. Solvents were purified and dried by standard methods prior to use. The identification of the mesophases and the transition temperatures of the compounds were initially determined using a polarizing microscope (Leitz DMRXP) in conjunction with a programmable hot stage (Mettler FP90). The transition temperatures and associated enthalpies were determined by differential scanning calorimetry (Perkin Elmer DSC7). The absorption spectra were recorded on a Perkin-Elmer Lambda 20 UV-Vis spectrometer. IR spectra were recorded using Perkin Elmer Spectrum 1000 FT-IR spectrometer. Mass spectra were recorded on a Jeol-JMS-600H spectrometer in FAB+ mode using 3-nitrobenzyl alcohol as a liquid matrix. CD spectra and specific rotation values were recorded with the aid of Jasco J-810 spectropolarimeter. Elemental analyses were done using Eurovector model EA 3000 CHNS analyzer. <sup>1</sup>H NMR spectra were recorded using either a Bruker AMX-400 (400 MHz) spectrometer and the chemical shifts are reported in parts per million (ppm) relative to tetramethylsilane (TMS) as an internal standard. X-ray diffraction studies were carried out on powder samples in Lindemann capillaries with CuK<sub>α</sub> radiation using an Image Plate Detector (MAC Science, Japan) equipped with a double mirror focusing optics.

#### 2. Syntheses and Analytical data

##### General procedure for the synthesis of hexacatenar bisamides (HBA-1 to HBA-10).

To a clear solution of 3,4,5-trialkoxybenzoic acid (**1a** / **1b**)<sup>1a</sup> (0.17 mmol, 1 equiv.) in dry THF (10 ml), DIEA (0.19 mmol, 1.1 equiv.) and HBTU (0.19 mmol, 1.1 equiv.) were added. To this reaction mixture, a solution of amines (**2** to **7**)<sup>1</sup> (0.17 mmol, 1 equiv.) in dry THF (10 ml) added and stirred at room temperature for 10 h under nitrogen atmosphere. The reaction mixture was concentrated under reduced pressure and the residue was dissolved in CH<sub>2</sub>Cl<sub>2</sub> (25 ml), washed successively twice with 5% HCl, 5% aq NaHCO<sub>3</sub>, brine and dried over anhydrous Na<sub>2</sub>SO<sub>4</sub>. The solvent was evaporated to get the crude material which was

purified by column chromatography using neutral alumina. The column was eluted with 5 % EtOAc-hexanes to obtain a solid which was further purified by recrystallization from ethanol.

**HBA-1:** 3,4,5-Tris-decyloxy-*N*-[1(*S*)-(3,4,5-tris-decyloxy-phenylcarbamoyl)-ethyl]-benzamide.  $R_f = 0.60$  in 20% EtOAc-hexanes; a gummy substance; yield: 64 %; IR (KBr pellet):  $\nu_{\max}$  in  $\text{cm}^{-1}$  3290, 2918, 2848, 1690, 1650, 1560, 1121;  $[\alpha]_{\text{D}}^{30} -7.01$  ( $c = 1\%$ ,  $\text{CHCl}_3$ ); UV-Vis:  $\lambda_{\max} = 263.91$  nm,  $\epsilon = 1.04 \times 10^4$  L mol $^{-1}$ cm $^{-1}$ ;  $^1\text{H NMR}$  (400MHz,  $\text{CDCl}_3$ ):  $\delta$  8.50 (s, 1H, NH), 6.95 (s, 2H, Ar), 6.80 (s, 2H, Ar), 6.59 (d,  $J = 7.5$  Hz, 1H, NH), 4.89 (m, 1H, CH), 4.02 – 3.87 (m, 12H, 6  $\times$  OCH $_2$ ), 1.88 – 0.86 (m, 117H, 7  $\times$  CH $_3$ , 48  $\times$  CH $_2$ ); MS (FAB+):  $m/z$  calcd for  $\text{C}_{76}\text{H}_{137}\text{N}_2\text{O}_8$  (M+1): 1206.9. Found: 1206.5; Anal. calcd for  $\text{C}_{76}\text{H}_{136}\text{N}_2\text{O}_8$ : C, 75.69; H, 11.37; N, 2.32. Found: C, 75.60; H, 11.46; N, 2.43.

**HBA-2:** 3,4,5-Tris-decyloxy-*N*-[3-methyl-1(*S*)-(3,4,5-tris-decyloxy-phenylcarbamoyl)-butyl]-benzamide.  $R_f = 0.62$  in 20% EtOAc-hexanes; a colorless solid; yield: 62 %; IR (KBr pellet):  $\nu_{\max}$  in  $\text{cm}^{-1}$  3284, 2918, 2848, 1694, 1650, 1540, 1120;  $[\alpha]_{\text{D}}^{30} -13.96$  ( $c = 1\%$ ,  $\text{CHCl}_3$ ); UV-Vis:  $\lambda_{\max} = 247.19$  nm,  $\epsilon = 2.36 \times 10^4$  L mol $^{-1}$ cm $^{-1}$ ;  $^1\text{H NMR}$  (400MHz,  $\text{CDCl}_3$ ):  $\delta$  8.19 (s, 1H, NH), 6.95 (s, 2H, Ar), 6.81 (s, 2H, Ar), 6.38 (d,  $J = 7.2$  Hz, 1H, NH), 4.74 (m, 1H, CH), 4.02 – 3.87 (m, 12H, 6  $\times$  OCH $_2$ ), 1.97 – 0.86 (m, 123H, 8  $\times$  CH $_3$ , 49  $\times$  CH $_2$ , 1  $\times$  CH); MS (FAB+):  $m/z$  calcd for  $\text{C}_{79}\text{H}_{142}\text{N}_2\text{O}_8$ : 1247.1. Found: 1247.9; Anal. calcd for  $\text{C}_{79}\text{H}_{142}\text{N}_2\text{O}_8$ : C, 76.03; H, 11.47; N, 2.25. Found: C, 75.89; H, 11.47; N, 2.43.

**HBA-3:** 3,4,5-Tris-decyloxy-*N*-[3-methyl-1(*R*)-(3,4,5-tris-decyloxy-phenylcarbamoyl)-butyl]-benzamide.  $R_f = 0.62$  in 20% EtOAc-hexanes; a colorless solid; yield: 62%; IR (KBr pellet):  $\nu_{\max}$  in  $\text{cm}^{-1}$  3286, 2920, 2858, 1690, 1640, 1536, 1128;  $[\alpha]_{\text{D}}^{30} +14.23$  ( $c = 1\%$ ,  $\text{CHCl}_3$ ); UV-Vis:  $\lambda_{\max} = 263.81$  nm,  $\epsilon = 6.28 \times 10^4$  L mol $^{-1}$ cm $^{-1}$ ;  $^1\text{H NMR}$  (400MHz,  $\text{CDCl}_3$ ):  $\delta$  8.23 (s, 1H, NH), 6.95 (s, 2H, Ar), 6.81 (s, 2H, Ar), 6.39 (d,  $J = 7.1$  Hz, 1H, NH), 4.76 (m, 1H, CH), 4.01 – 3.87 (m, 12H, 6  $\times$  OCH $_2$ ), 1.99 – 0.86 (m, 123H, 8  $\times$  CH $_3$ , 49  $\times$  CH $_2$ , 1  $\times$  CH); MS (FAB+):  $m/z$  calcd for  $\text{C}_{79}\text{H}_{143}\text{N}_2\text{O}_8$  (M+1): 1248.1. Found: 1248.5; Anal. calcd for  $\text{C}_{79}\text{H}_{142}\text{N}_2\text{O}_8$ : C, 76.03; H, 11.47; N, 2.25. Found: C, 75.96; H, 11.49; N, 2.36.

**HBA-4:** 3,4,5-Tris-decyloxy-*N*-[2-methyl-1(*S*)-(3,4,5-tris-decyloxy-phenylcarbamoyl)-propyl]-benzamide.  $R_f = 0.61$  in 20% EtOAc-hexanes; a colorless solid; yield: 60 %; IR (KBr pellet):  $\nu_{\max}$  in  $\text{cm}^{-1}$  3285, 2925, 2860, 1694, 1642, 1538, 1124;  $[\alpha]_{\text{D}}^{29} -14.11$  ( $c = 1\%$ ,  $\text{CHCl}_3$ ); UV-Vis:  $\lambda_{\max} = 263.94$  nm,  $\epsilon = 2.14 \times 10^4$  L mol $^{-1}$ cm $^{-1}$ ;  $^1\text{H NMR}$  (400MHz,  $\text{CDCl}_3$ ):  $\delta$  7.86 (s, 1H, NH), 6.97 (s, 2H, Ar), 6.79 (s, 2H, Ar), 6.39 (d,  $J = 8.6$  Hz, 1H, NH), 4.45 (m, 1H, CH), 3.99 – 3.87 (m, 12H, 6  $\times$  OCH $_2$ ), 2.32 (m, 1H, 1  $\times$  CH), 1.82 – 0.86 (m, 120H, 8  $\times$  CH $_3$ , 48  $\times$  CH $_2$ ); MS (FAB+):  $m/z$  calcd for  $\text{C}_{78}\text{H}_{141}\text{N}_2\text{O}_8$  (M+1): 1234.1. Found: 1234.5; Anal. calcd for  $\text{C}_{78}\text{H}_{140}\text{N}_2\text{O}_8$ : C, 75.92; H, 11.44; N, 2.27. Found: C, 75.62; H, 11.65; N, 2.52.

**HBA-5:** 3,4,5-Tris-decyloxy-*N*-[2-methyl-1(*R*)-(3,4,5-tris-decyloxy-phenylcarbamoyl)-propyl]-benzamide.  $R_f = 0.61$  in 20% EtOAc-hexanes; a colorless solid; yield: 61 %; IR (KBr pellet):  $\nu_{\max}$  in  $\text{cm}^{-1}$  3283, 2929, 2868, 1690, 1640, 1540, 1125;  $[\alpha]_{\text{D}}^{29} +16.02$  ( $c = 1\%$ ,  $\text{CHCl}_3$ ); UV-Vis:  $\lambda_{\max} = 263.90$  nm,  $\epsilon = 2.00 \times 10^4$  L mol $^{-1}$ cm $^{-1}$ ;  $^1\text{H NMR}$  (400MHz,  $\text{CDCl}_3$ ):  $\delta$  7.93 (s, 1H, NH), 6.98 (s, 2H, Ar), 6.79 (s, 2H, Ar), 6.65 (d,  $J = 8.6$  Hz, 1H, NH), 4.47 (m, 1H, CH), 4.01 – 3.87 (m, 12H, 6  $\times$  OCH $_2$ ), 2.31 (m, 1H, 1  $\times$  CH), 1.82 – 0.86 (m, 120H, 8  $\times$  CH $_3$ , 48  $\times$  CH $_2$ ); MS (FAB+):  $m/z$  calcd for  $\text{C}_{78}\text{H}_{140}\text{N}_2\text{O}_8$ : 1233.1. Found: 1233.9; Anal. calcd for  $\text{C}_{78}\text{H}_{140}\text{N}_2\text{O}_8$ : C, 75.92; H, 11.44; N, 2.27. Found: C, 75.86; H, 11.58; N, 2.44.

**HBA-6:** 3,4,5-Tris-dodecyloxy-*N*-[1(*S*)-(3,4,5-tris-dodecyloxy-phenylcarbamoyl)-ethyl]-benzamide.  $R_f = 0.61$  in 20% EtOAc-hexanes; a colorless solid; yield: 63 %; IR (KBr pellet):  $\nu_{\max}$  in  $\text{cm}^{-1}$  3287, 2919, 2849, 1697, 1602, 1558, 1121;  $[\alpha]_{\text{D}}^{26} -10.03$  ( $c = 1\%$ ,  $\text{CHCl}_3$ ); UV-

Vis:  $\lambda_{\max} = 247.87 \text{ nm}$ ,  $\epsilon = 1.58 \times 10^3 \text{ L mol}^{-1}\text{cm}^{-1}$ ;  $^1\text{H NMR}$  (400MHz,  $\text{CDCl}_3$ ):  $\delta$  8.39 (s, 1H, NH), 6.96 (s, 2H, Ar), 6.81 (s, 2H, Ar), 6.52 (d,  $J = 7.3 \text{ Hz}$ , 1H, NH), 4.81 (m, 1H, CH), 4.01 – 3.87 (m, 12H,  $6 \times \text{OCH}_2$ ), 1.82 – 0.86 (m, 141H,  $7 \times \text{CH}_3$ ,  $60 \times \text{CH}_2$ ); MS (FAB+):  $m/z$  calcd for  $\text{C}_{88}\text{H}_{161}\text{N}_2\text{O}_8$  (M+1): 1374.2. Found: 1374.6; Anal. calcd for  $\text{C}_{88}\text{H}_{160}\text{N}_2\text{O}_8$ : C, 76.91; H, 11.74; N, 2.04. Found: C, 77.07; H, 12.04; N, 2.11.

**HBA-7:** 3,4,5-Tris-dodecyloxy-*N*-[3-methyl-1(*S*)-(3,4,5-tris-dodecyloxy-phenylcarbamoyl)-butyl]-benzamide.  $R_f = 0.61$  in 20% EtOAc-hexanes; a colorless solid; yield: 60 %; IR (KBr pellet):  $\nu_{\max}$  in  $\text{cm}^{-1}$  3266, 2920, 2849, 1669, 1628, 1540, 1117;  $[\alpha]_{\text{D}}^{26} - 13.05$  ( $c = 1\%$ ,  $\text{CHCl}_3$ ); UV-Vis:  $\lambda_{\max} = 264.94 \text{ nm}$ ,  $\epsilon = 2.23 \times 10^4 \text{ L mol}^{-1}\text{cm}^{-1}$ ;  $^1\text{H NMR}$  (400MHz,  $\text{CDCl}_3$ ):  $\delta$  8.30 (s, 1H, NH), 6.95 (s, 2H, Ar), 6.80 (s, 2H, Ar), 6.44 (d,  $J = 7.9 \text{ Hz}$ , 1H, NH), 4.75 (m, 1H, CH), 4.00 – 3.85 (m, 12H,  $6 \times \text{OCH}_2$ ), 1.93 – 0.86 (m, 147H,  $8 \times \text{CH}_3$ ,  $61 \times \text{CH}_2$ ,  $1 \times \text{CH}$ );  $^{13}\text{C NMR}$  (100MHz,  $\text{CDCl}_3$ ): 170.15, 167.50, 165.9, 153.16, 134.83, 133.34, 128.14, 105.75, 98.75, 73.48, 69.38, 68.97, 53.15, 40.71, 31.91, 30.31, 29.67, 29.37, 26.08, 24.95, 22.84, 22.67, 22.41, 14.07; MS (FAB+):  $m/z$  calcd for  $\text{C}_{91}\text{H}_{167}\text{N}_2\text{O}_8$  (M+1): 1416.2. Found: 1416.1; Anal. calcd for  $\text{C}_{91}\text{H}_{166}\text{N}_2\text{O}_8$ : C, 77.17; H, 11.81; N, 1.98. Found: C, 76.98; H, 12.01; N, 2.27.

**HBA-8:** 3,4,5-Tris-dodecyloxy-*N*-[3-methyl-1(*R*)-(3,4,5-tris-dodecyloxy-phenylcarbamoyl)-butyl]-benzamide.  $R_f = 0.61$  in 20% EtOAc-hexanes; a colorless solid; yield: 62 %; IR (KBr pellet):  $\nu_{\max}$  in  $\text{cm}^{-1}$  3266, 2920, 2849, 1669, 1628, 1540, 1117;  $[\alpha]_{\text{D}}^{26} + 14.86$  ( $c = 1\%$ ,  $\text{CHCl}_3$ ); UV-Vis:  $\lambda_{\max} = 264.88 \text{ nm}$ ,  $\epsilon = 2.11 \times 10^4 \text{ L mol}^{-1}\text{cm}^{-1}$ ;  $^1\text{H NMR}$  (400MHz,  $\text{CDCl}_3$ ):  $\delta$  8.12 (s, 1H, NH), 6.95 (s, 2H, Ar), 6.80 (s, 2H, Ar), 6.43 (d,  $J = 7.9 \text{ Hz}$ , 1H, NH), 4.75 (m, 1H, CH), 4.00 – 3.88 (m, 12H,  $6 \times \text{OCH}_2$ ), 1.93 – 0.86 (m, 147H,  $8 \times \text{CH}_3$ ,  $61 \times \text{CH}_2$ ,  $1 \times \text{CH}$ ); MS (FAB+):  $m/z$  calcd for  $\text{C}_{91}\text{H}_{166}\text{N}_2\text{O}_8$ : 1415.2. Found: 1415.7; Anal. calcd for  $\text{C}_{91}\text{H}_{166}\text{N}_2\text{O}_8$ : C, 77.17; H, 11.81; N, 1.98. Found: C, 76.98; H, 12.01; N, 2.25.

**HBA-9:** 3,4,5-Tris-dodecyloxy-*N*-[2-methyl-1(*S*)-(3,4,5-tris-dodecyloxy-phenylcarbamoyl)-propyl]-benzamide.  $R_f = 0.62$  in 20% EtOAc-hexanes; a colorless solid; yield: 64 %; IR (KBr pellet):  $\nu_{\max}$  in  $\text{cm}^{-1}$  3287, 2920, 2849, 1697, 1602, 1535, 1120;  $[\alpha]_{\text{D}}^{26} - 10.36$  ( $c = 1\%$ ,  $\text{CHCl}_3$ ); UV-Vis:  $\lambda_{\max} = 247.57 \text{ nm}$ ,  $\epsilon = 2.28 \times 10^4 \text{ L mol}^{-1}\text{cm}^{-1}$ ;  $^1\text{H NMR}$  (400MHz,  $\text{CDCl}_3$ ):  $\delta$  8.07 (s, 1H, NH), 6.97 (s, 2H, Ar), 6.79 (s, 2H, Ar), 6.69 (d,  $J = 8.7 \text{ Hz}$ , 1H, NH), 4.53 (m, 1H, CH), 3.99 – 3.86 (m, 12H,  $6 \times \text{OCH}_2$ ), 2.34 (m, 1H,  $1 \times \text{CH}$ ), 1.81 – 0.86 (m, 144H,  $8 \times \text{CH}_3$ ,  $60 \times \text{CH}_2$ ); MS (FAB+):  $m/z$  calcd for  $\text{C}_{90}\text{H}_{164}\text{N}_2\text{O}_8$ : 1401.2. Found: 1401.1; Anal. calcd for  $\text{C}_{90}\text{H}_{164}\text{N}_2\text{O}_8$ : C, 77.07; H, 11.79; N, 2.00. Found: C, 77.29; H, 11.95; N, 2.19.

**HBA-10:** 3,4,5-Tris-dodecyloxy-*N*-[2-methyl-1(*R*)-(3,4,5-tris-dodecyloxy-phenylcarbamoyl)-propyl]-benzamide.  $R_f = 0.62$  in 20% EtOAc-hexanes; a colorless solid; yield: 65 %; IR (KBr pellet):  $\nu_{\max}$  in  $\text{cm}^{-1}$  3289, 2921, 2849, 1697, 1602, 1534, 1121;  $[\alpha]_{\text{D}}^{26} + 9.96$  ( $c = 1\%$ ,  $\text{CHCl}_3$ ); UV-Vis:  $\lambda_{\max} = 247.83 \text{ nm}$ ,  $\epsilon = 2.33 \times 10^4 \text{ L mol}^{-1}\text{cm}^{-1}$ ;  $^1\text{H NMR}$  (400MHz,  $\text{CDCl}_3$ ):  $\delta$  7.92 (s, 1H, NH), 6.97 (s, 2H, Ar), 6.79 (s, 2H, Ar), 6.65 (d,  $J = 8.5 \text{ Hz}$ , 1H, NH), 4.48 (m, 1H, CH), 3.99 – 3.87 (m, 12H,  $6 \times \text{OCH}_2$ ), 2.34 (m, 1H,  $1 \times \text{CH}$ ), 1.81 – 0.85 (m, 144H,  $8 \times \text{CH}_3$ ,  $60 \times \text{CH}_2$ ); MS (FAB+):  $m/z$  calcd for  $\text{C}_{90}\text{H}_{164}\text{N}_2\text{O}_8$ : 1401.2. Found: 1401.1; Anal. calcd for  $\text{C}_{90}\text{H}_{164}\text{N}_2\text{O}_8$ : C, 77.07; H, 11.79; N, 2.00. Found: C, 77.37; H, 11.59; N, 2.10.

### 3. Additional datas

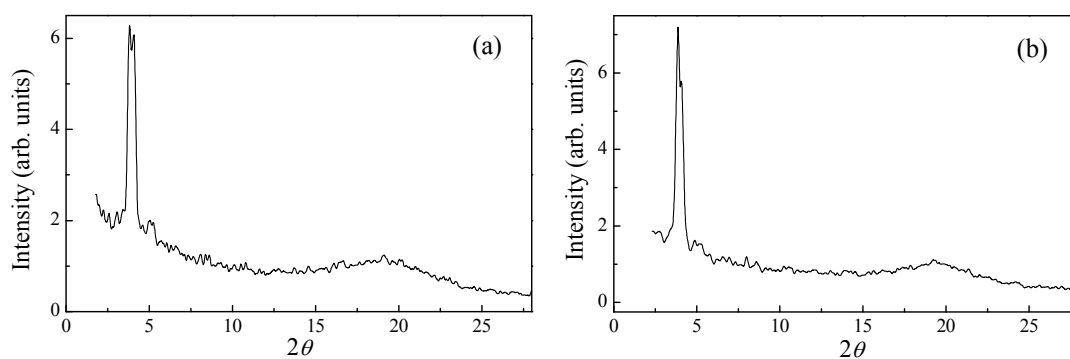

Figure S1. 1D intensity vs  $2\theta$  profiles obtained for the Col<sub>r</sub> phase (a) at 70 °C (b) at 25 °C of **HBA-7**.

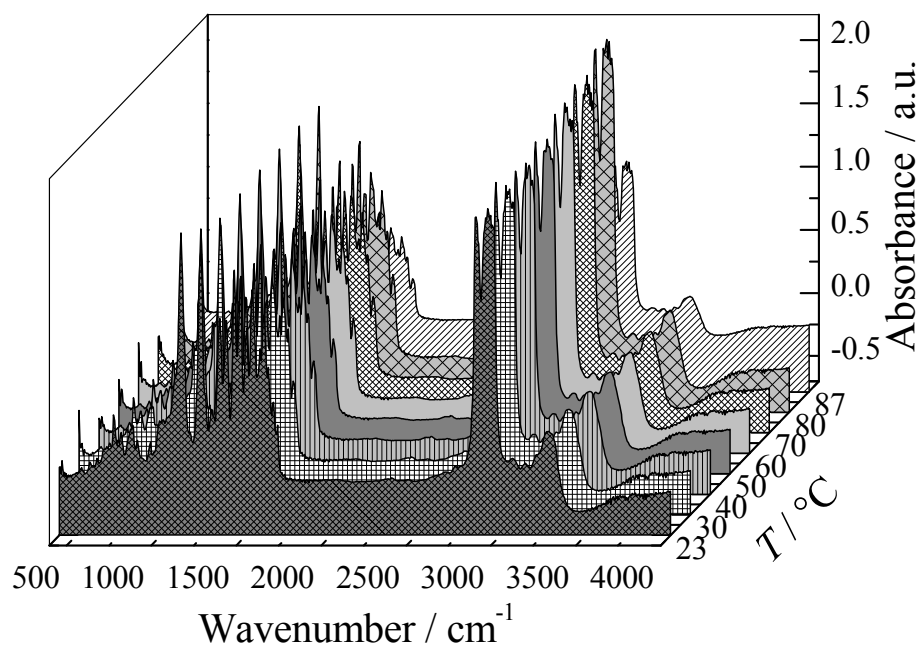

Figure S2. FTIR spectra obtained for the compound **HBA-10** as a function of temperature.

**Table S1.** CD spectroscopic data obtained for the hexacatenar bisamides **HBA-4** and **HBA-5**.

| Compound     | <i>T</i> /°C | CD                          |                  |
|--------------|--------------|-----------------------------|------------------|
|              |              | $\lambda_{\text{max}}$ (nm) | Intensity (mdeg) |
| <b>HBA-4</b> | 23           | 300.5                       | -26.9            |
|              | 30           | 300.1                       | -26.5            |
|              | 40           | 299.7                       | -24.5            |
|              | 50           | 299.3                       | -24.9            |
|              | 60           | 299.7                       | -23.3            |
|              | 70           | 299.7                       | -27.1            |
|              | 80           | 299.7                       | -25.6            |
|              | 97           | 295.4                       | -6.88            |
| <b>HBA-5</b> | 24           | 304.1                       | +30.3            |
|              | 30           | 304.2                       | +34.1            |
|              | 40           | 304.5                       | +35.3            |
|              | 50           | 305.3                       | +35.9            |
|              | 60           | 304.9                       | +34.3            |
|              | 70           | 305.1                       | +33.4            |
|              | 80           | 305.1                       | +34.7            |
|              | 97           | 304.7                       | +15.4            |

## References

- 1 (a) C. V. Yelamaggad, G. Shanker, R. V. Ramana Rao, D. S. Shankar Rao, S. K. Prasad and V. V. Suresh Babu, *Chem. Eur. J.*, 2008, **14**, 10462-10471; (b) G. Shanker, D. S. Shankar Rao, S. Krishna Prasad and C. V. Yelamaggad, submitted.
